# Supplementary material for: Human DDX6 regulates translation and decay of inefficiently translated mRNAs
Source: eLife journal article supplement (doi:10.7554/elife.92426), 2024-01-05

Figure 2

**A** DDX6 – Ribosome interaction *in vitro*

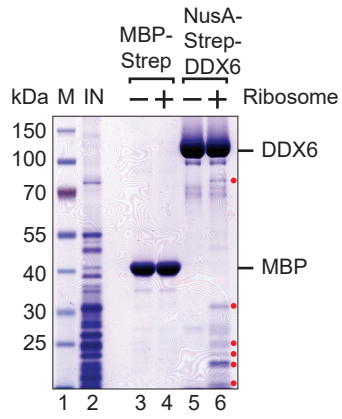

**A** DDX6 – Ribosome interaction *in vitro*

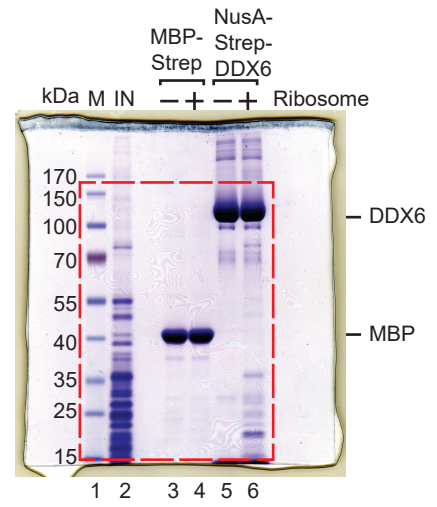

Supplement: fig2-data2 [file elife-92426-fig2-data2-v1.pdf]
