# Supplementary material for: Human DDX6 regulates translation and decay of inefficiently translated mRNAs
Source: eLife journal article supplement (doi:10.7554/elife.92426), 2024-01-05

Figure 2

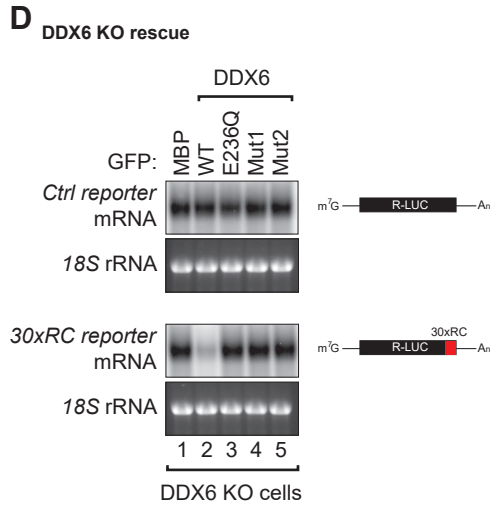

**D** DDX6 KO rescue

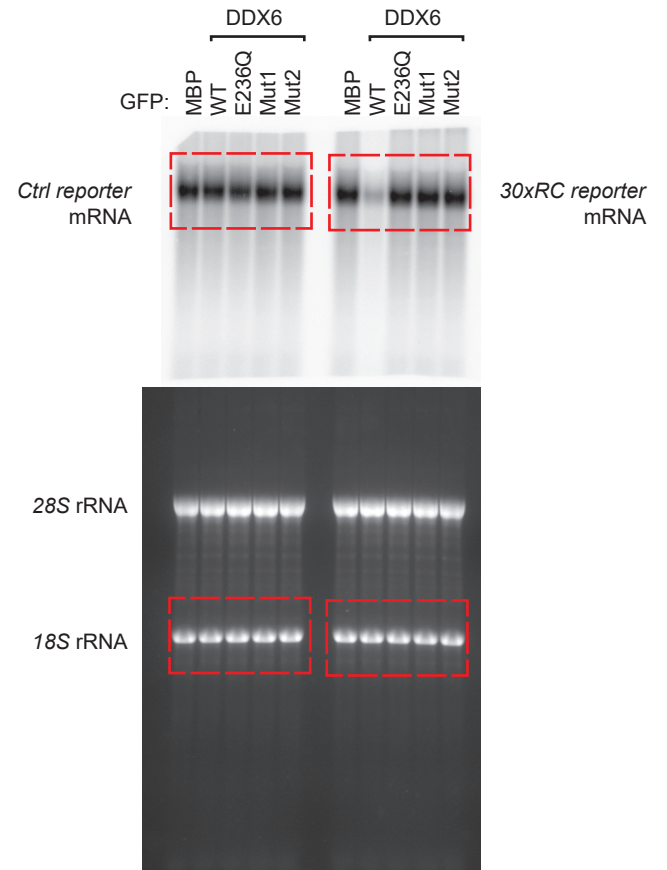

Supplement: fig2-data8 [file elife-92426-fig2-data8-v1.pdf]
