# Supplementary material for: Human DDX6 regulates translation and decay of inefficiently translated mRNAs
Source: eLife journal article supplement (doi:10.7554/elife.92426), 2024-01-05

**Figure 3**

**I DDX6 KO cells rescue**

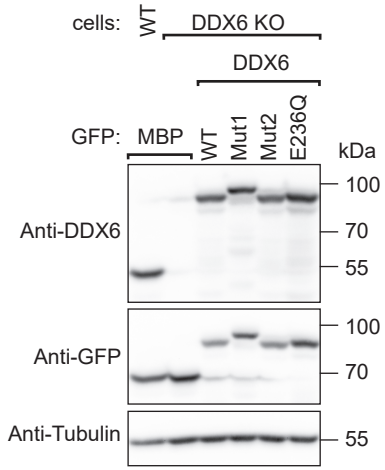

**I DDX6 KO cells rescue**

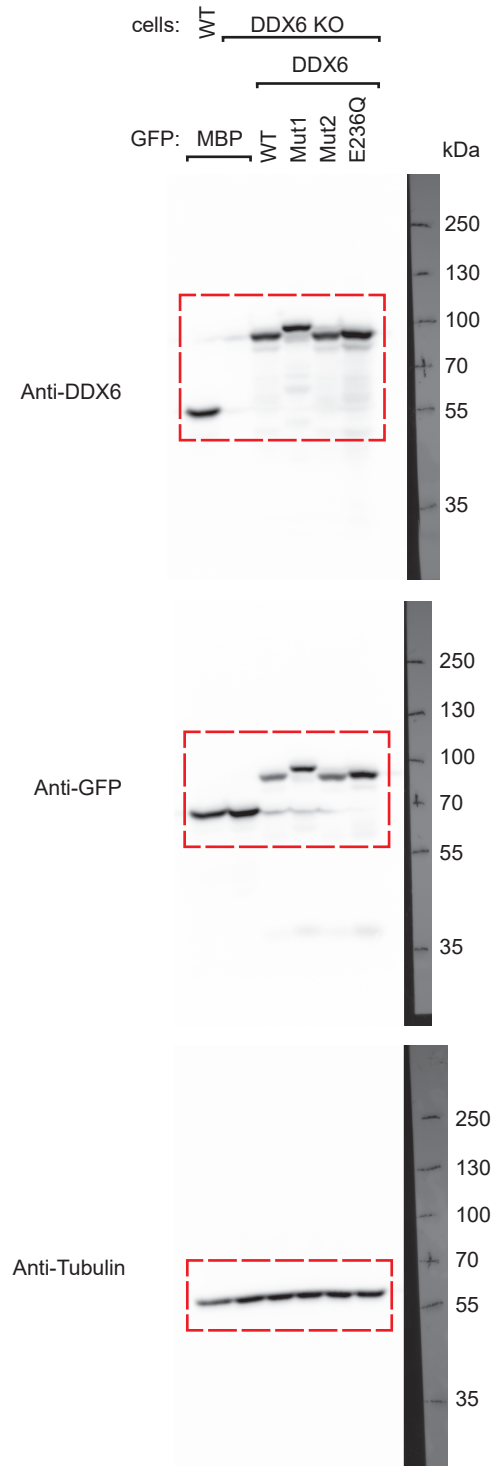

Supplement: fig3-data2 [file elife-92426-fig3-data2-v1.pdf]
