# Supplementary material for: Human DDX6 regulates translation and decay of inefficiently translated mRNAs
Source: eLife journal article supplement (doi:10.7554/elife.92426), 2024-01-05

**Figure 4**

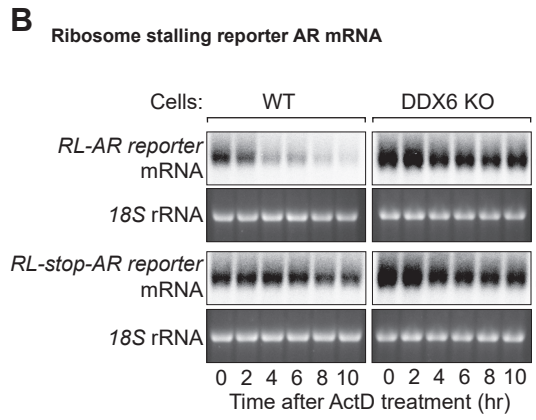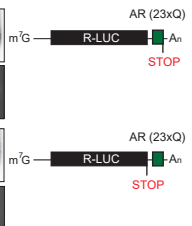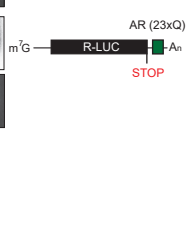

**B** Ribosome stalling reporter AR mRNA

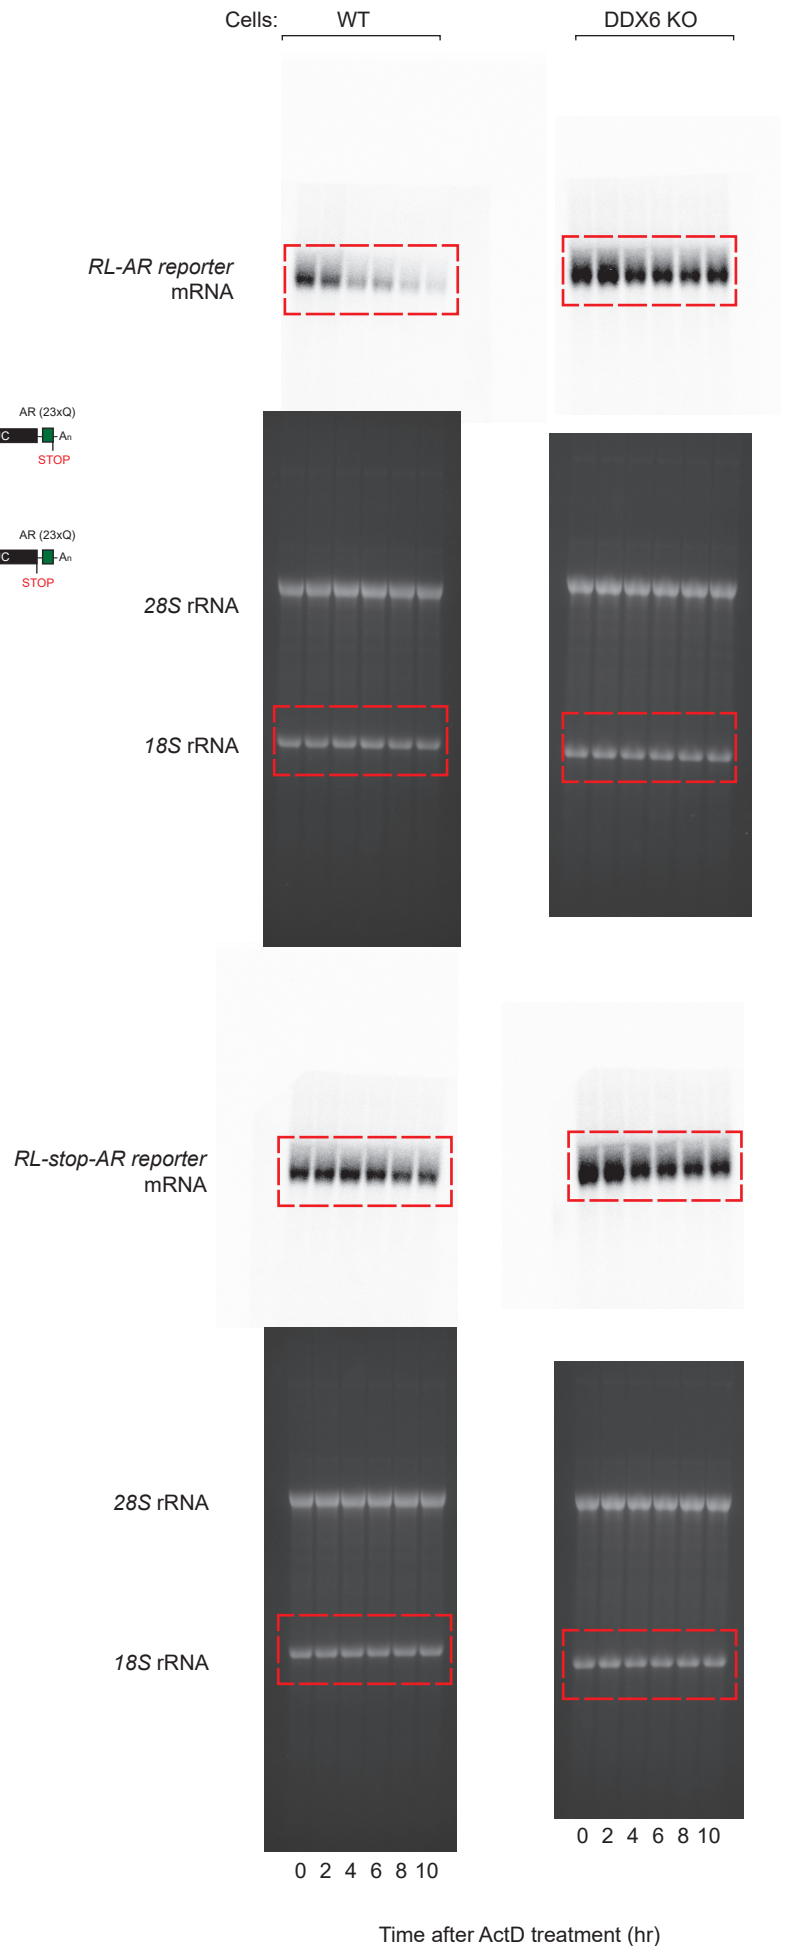

Supplement: fig4-data2 [file elife-92426-fig4-data2-v1.pdf]
