# Supplementary material for: Human DDX6 regulates translation and decay of inefficiently translated mRNAs
Source: eLife journal article supplement (doi:10.7554/elife.92426), 2024-01-05

**Figure 4**

**D Ribosome stalling reporter BMP2 mRNA**

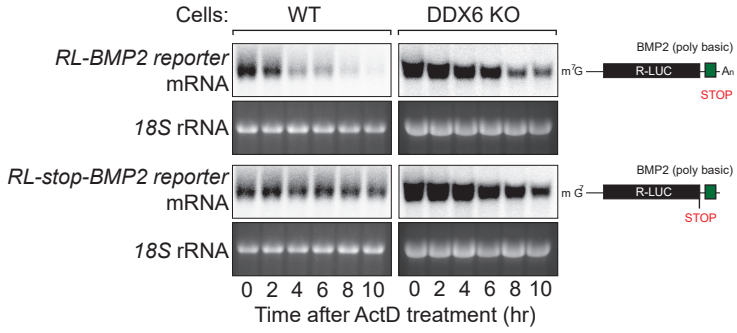

**D Ribosome stalling reporter BMP2 mRNA**

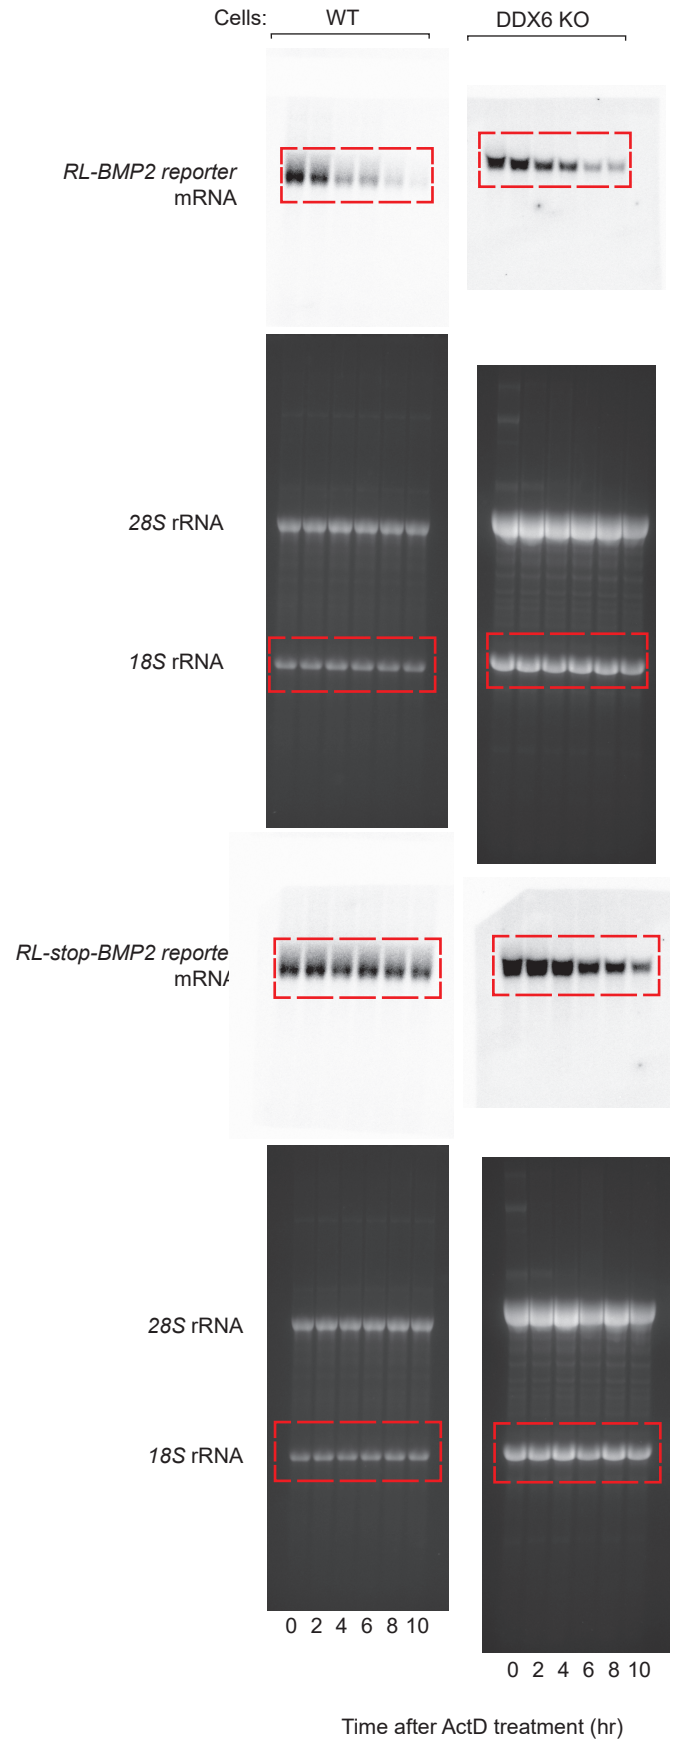

Supplement: fig4-data4 [file elife-92426-fig4-data4-v1.pdf]
